# Supplementary material
Source: PubMed Central journal article supplement (PMC1175136)

**Supplemental Figure 1**

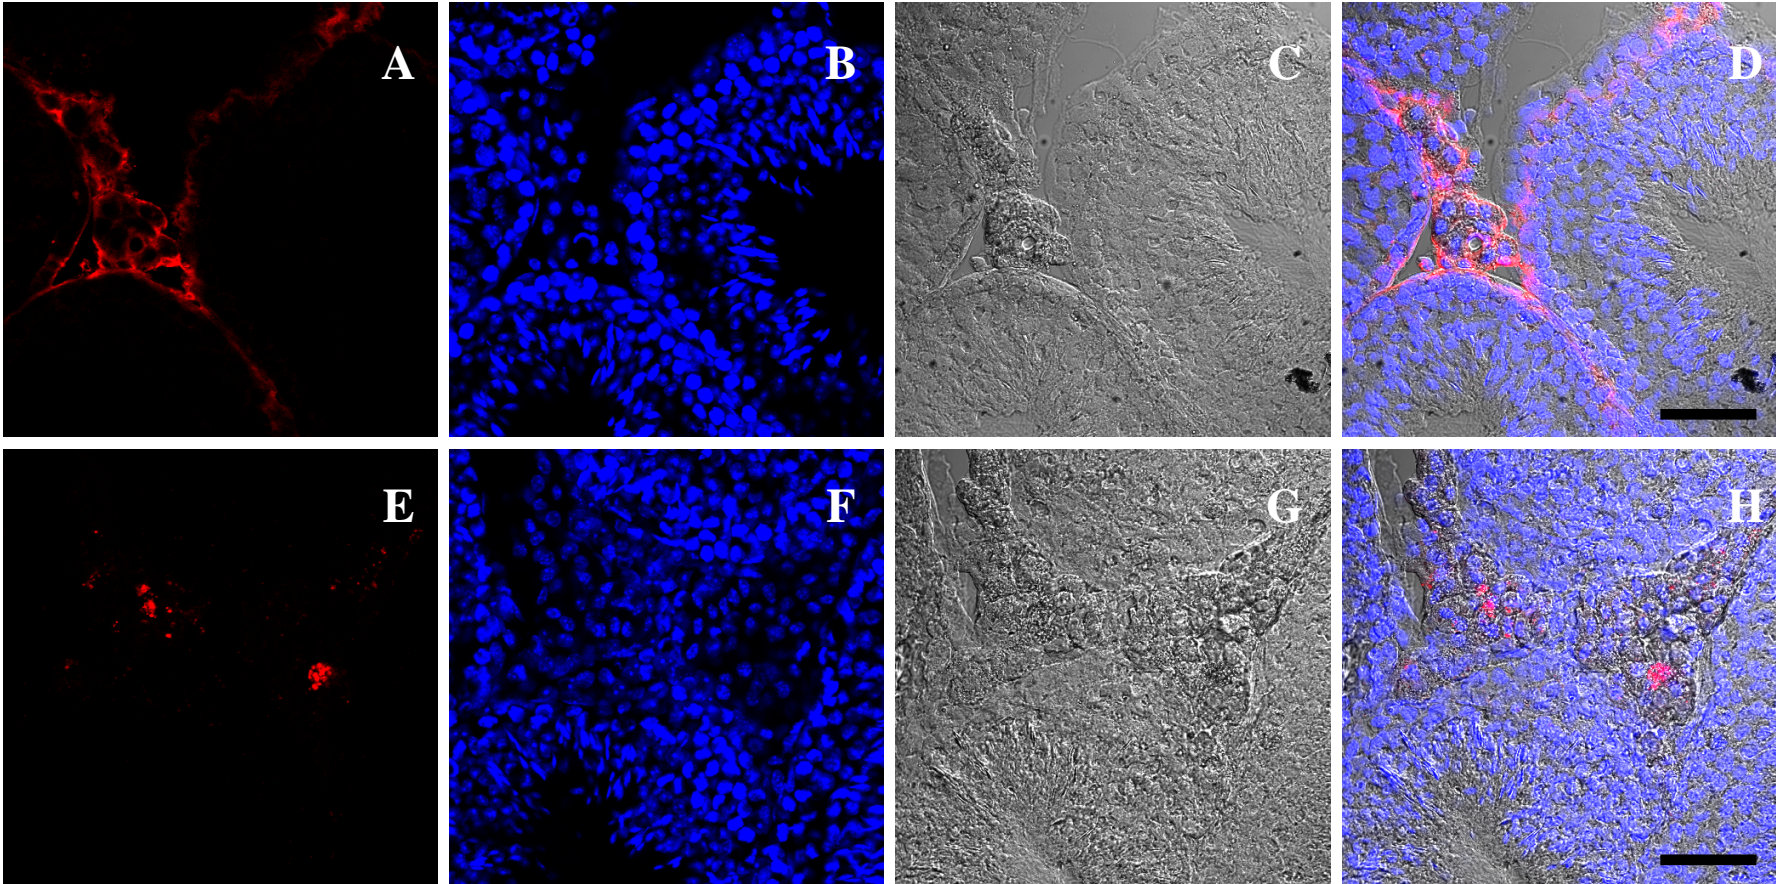

Supplement: bj3890577add_fig1.pdf [file bj3890577add_fig1.pdf]
